# Supplementary material for: Analysis of COMMD10 Expression Patterns in Gliomas and Its Impact on Immune Cell Infiltration and Patient Prognosis
Source: Research Square preprint supplement (doi:10.21203/rs.3.rs-8281411/v1), 2025-12-22
Supplement: Supplementary file 1 [file 0653f65343047615258613f8.docx]

Table 2.

Logistic analysis of the association between COMMD10 expression and clinical characteristics.

| Characteristics | Total (N) | OR (95% CI) | P value |
| --- | --- | --- | --- |
| Age (> 60 vs. <= 60) | 699 | 2.525 (1.712 – 3.725) | **< 0.001** |
| Gender (Male vs. Female) | 699 | 1.104 (0.818 – 1.490) | 0.519 |
| WHO grade (G3&G4 vs. G2) | 637 | 3.021 (2.152 – 4.240) | **< 0.001** |
| IDH status (Mut vs. WT) | 689 | 0.150 (0.105 – 0.215) | **< 0.001** |
| 1p/19q codeletion (Codel vs. Non-codel) | 692 | 0.379 (0.263 – 0.545) | **< 0.001** |
| Primary therapy outcome (PR&CR vs. PD&SD) | 465 | 0.640 (0.434 – 0.943) | **0.024** |
| Race (Black or African American vs. Asian&White) | 686 | 1.211 (0.600 – 2.444) | 0.593 |
| Histological type (Astrocytoma&Oligoastrocytoma&Oligodendroglioma vs. Glioblastoma) | 699 | 0.053 (0.030 – 0.094) | **< 0.001** |
