# Supplementary material for: Analysis of COMMD10 Expression Patterns in Gliomas and Its Impact on Immune Cell Infiltration and Patient Prognosis
Source: Research Square preprint supplement (doi:10.21203/rs.3.rs-8281411/v1), 2025-12-22
Supplement: Supplementary file 2 [file 1b3b43c29de7b3a231af40c8.docx]

Table 1.

Clinical characteristics of glioma patients.

| Characteristics | Low expression of COMMD10 | High expression of COMMD10 | P value |
| --- | --- | --- | --- |
| n | 349 | 350 |  |
| Age, n (%) |  |  | < 0.001 |
| <= 60 | 303 (43.3%) | 253 (36.2%) |  |
| > 60 | 46 (6.6%) | 97 (13.9%) |  |
| Gender, n (%) |  |  | 0.519 |
| Male | 196 (28%) | 205 (29.3%) |  |
| Female | 153 (21.9%) | 145 (20.7%) |  |
| WHO grade, n (%) |  |  | < 0.001 |
| G2 | 146 (22.9%) | 78 (12.2%) |  |
| G3 | 144 (22.6%) | 101 (15.9%) |  |
| G4 | 14 (2.2%) | 154 (24.2%) |  |
| IDH status, n (%) |  |  | < 0.001 |
| WT | 55 (8%) | 191 (27.7%) |  |
| Mut | 291 (42.2%) | 152 (22.1%) |  |
| 1p/19q codeletion, n (%) |  |  | < 0.001 |
| Non-codel | 232 (33.5%) | 288 (41.6%) |  |
| Codel | 117 (16.9%) | 55 (7.9%) |  |
| Histological type, n (%) |  |  | < 0.001 |
| Astrocytoma | 116 (16.6%) | 80 (11.4%) |  |
| Oligoastrocytoma | 94 (13.4%) | 41 (5.9%) |  |
| Oligodendroglioma | 125 (17.9%) | 75 (10.7%) |  |
| Glioblastoma | 14 (2%) | 154 (22%) |  |
| Race, n (%) |  |  | 0.123 |
| Asian | 3 (0.4%) | 10 (1.5%) |  |
| Black or African American | 15 (2.2%) | 18 (2.6%) |  |
| White | 325 (47.4%) | 315 (45.9%) |  |
| Primary therapy outcome, n (%) |  |  | 0.095 |
| PD | 63 (13.5%) | 49 (10.5%) |  |
| SD | 92 (19.8%) | 56 (12%) |  |
| PR | 47 (10.1%) | 18 (3.9%) |  |
| CR | 96 (20.6%) | 44 (9.5%) |  |
| OS event, n (%) |  |  | < 0.001 |
| Alive | 262 (37.5%) | 165 (23.6%) |  |
| Dead | 87 (12.4%) | 185 (26.5%) |  |
| DSS event, n (%) |  |  | < 0.001 |
| No | 266 (39.2%) | 168 (24.8%) |  |
| Yes | 75 (11.1%) | 169 (24.9%) |  |
| PFI event, n (%) |  |  | < 0.001 |
| No | 210 (30%) | 143 (20.5%) |  |
| Yes | 139 (19.9%) | 207 (29.6%) |  |
