# Supplementary material for: Analysis of COMMD10 Expression Patterns in Gliomas and Its Impact on Immune Cell Infiltration and Patient Prognosis
Source: Research Square preprint supplement (doi:10.21203/rs.3.rs-8281411/v1), 2025-12-22
Supplement: Supplementary file 3 [file b3e3a4bbd4f89dd7ad10a4fb.docx]

Table 3.

Univariate and multivariate cox regression analyses of clinical characteristics associated with overall survival.

| Characteristics | Total(N) | Univariate analysis | |  | Multivariate analysis | |
| --- | --- | --- | --- | --- | --- | --- |
| Hazard ratio (95% CI) | P value | Hazard ratio (95% CI) | P value |
| Age | 698 |  |  |  |  |  |
| <= 60 | 555 | Reference |  |  | Reference |  |
| > 60 | 143 | 4.696 (3.620 - 6.093) | **< 0.001** |  | 3.605 (2.227 - 5.834) | **< 0.001** |
| Gender | 698 |  |  |  |  |  |
| Male | 401 | Reference |  |  | Reference |  |
| Female | 297 | 0.800 (0.627 - 1.021) | 0.073 |  | 0.691 (0.451 - 1.057) | 0.088 |
| WHO grade | 636 |  |  |  |  |  |
| G2 | 223 | Reference |  |  | Reference |  |
| G3 | 245 | 2.967 (1.986 - 4.433) | **< 0.001** |  | 1.880 (1.201 - 2.944) | **0.006** |
| G4 | 168 | 18.600 (12.448 - 27.794) | **< 0.001** |  | 5.916 (1.876 - 18.660) | **0.002** |
| 1p/19q codeletion | 691 |  |  |  |  |  |
| Non-codel | 520 | Reference |  |  | Reference |  |
| Codel | 171 | 0.225 (0.147 - 0.346) | **< 0.001** |  | 0.650 (0.377 - 1.120) | 0.121 |
| IDH status | 688 |  |  |  |  |  |
| WT | 246 | Reference |  |  | Reference |  |
| Mut | 442 | 0.116 (0.089 - 0.151) | **< 0.001** |  | 0.365 (0.224 - 0.594) | **< 0.001** |
| Race | 685 |  |  |  |  |  |
| Asian | 13 | Reference |  |  |  |  |
| Black or African American | 33 | 1.578 (0.453 - 5.494) | 0.473 |  |  |  |
| White | 639 | 1.170 (0.374 - 3.657) | 0.787 |  |  |  |
| Primary therapy outcome | 464 |  |  |  |  |  |
| PD&SD | 260 | Reference |  |  | Reference |  |
| PR&CR | 204 | 0.205 (0.117 - 0.359) | **< 0.001** |  | 0.284 (0.154 - 0.527) | **< 0.001** |
| COMMD10 | 698 |  |  |  |  |  |
| Low | 348 | Reference |  |  | Reference |  |
| High | 350 | 3.467 (2.660 - 4.520) | **< 0.001** |  | 1.509 (1.015 - 2.244) | **0.042** |
